# Supplementary material for: Grid cells encode reward distance during path integration in cue-rich environments
Source: Research Square preprint supplement (doi:10.21203/rs.3.rs-7534017/v1), 2025-10-15
Supplement: Supplementary file [file fbd60eb9d0e8209317a0f3f9.pdf]

# **Grid cells encode reward distance during path integration in cue-rich environments**

Satoshi Kuroki<sup>1,2</sup> and Sébastien Royer<sup>1,3\*</sup>

<sup>1</sup> Korea Institute of Science and Technology, Seoul 02792, Republic of Korea

<sup>2</sup> Department of Physiology, Osaka Metropolitan University Graduate School of Medicine, Osaka, 545-8585, Japan

<sup>3</sup> Division of Bio-Medical Science and Technology, KIST School, Korea University of Science and Technology (UST), Seoul 02792, Republic of Korea

\*Correspondence: [royers@kist.re.kr](mailto:royers@kist.re.kr)

## **Supplementary Materials for:**

Grid cells encode reward distance during path integration in cue-rich environments

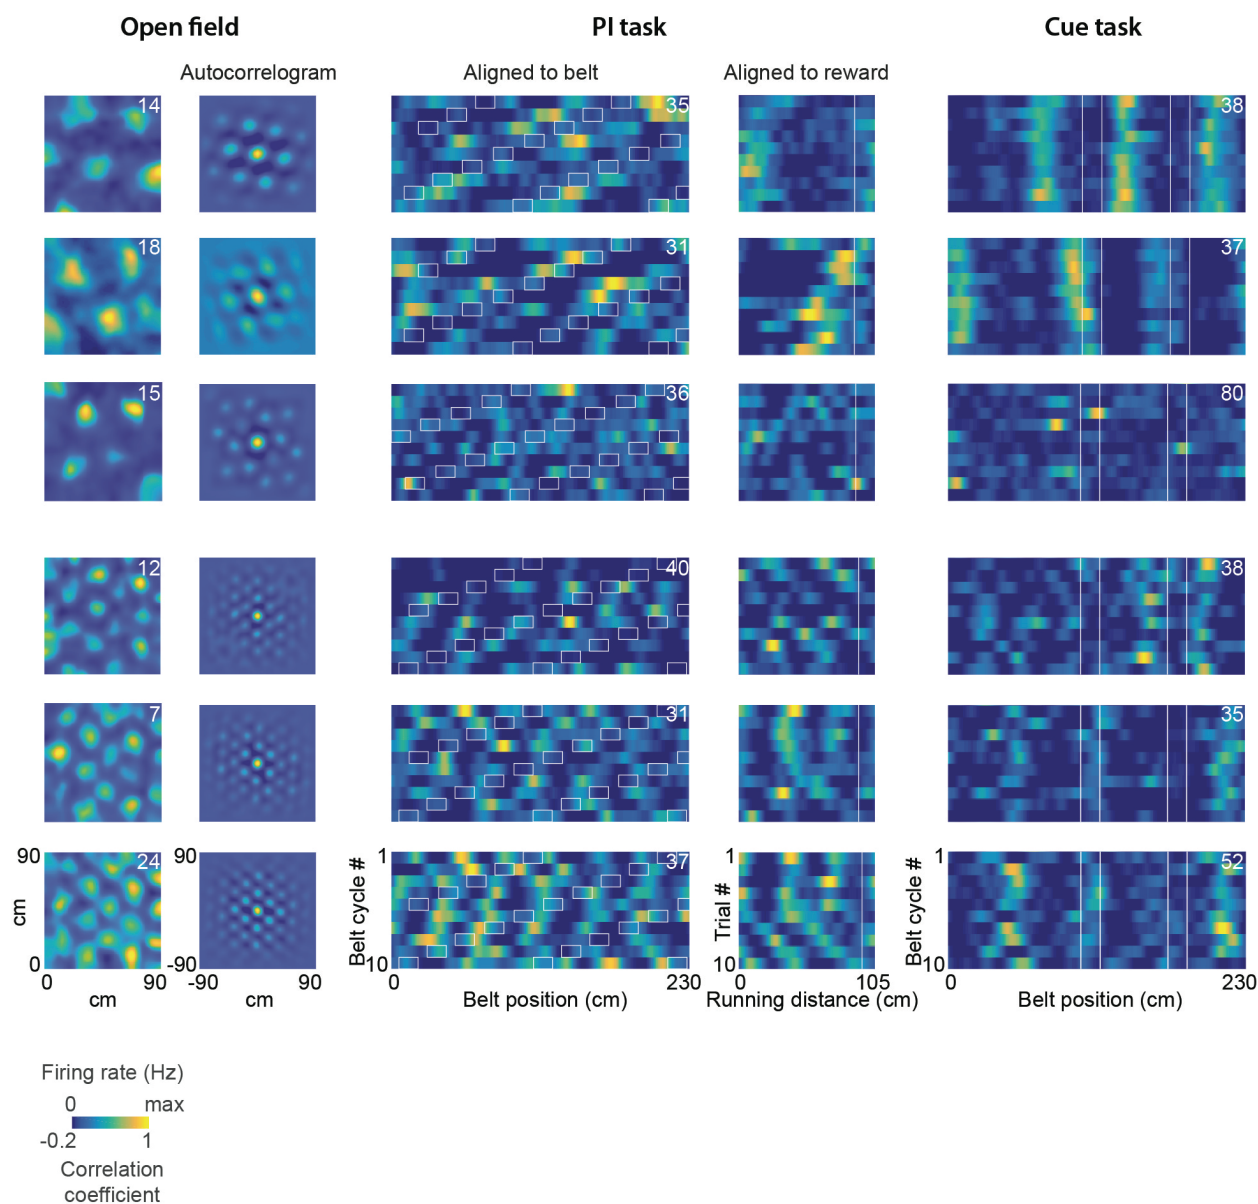

**Supplementary Figure 1.** Example grid cells recorded consecutively in open field, PI, and cue tasks. Rows show individual cells; displays as in Fig. 2.

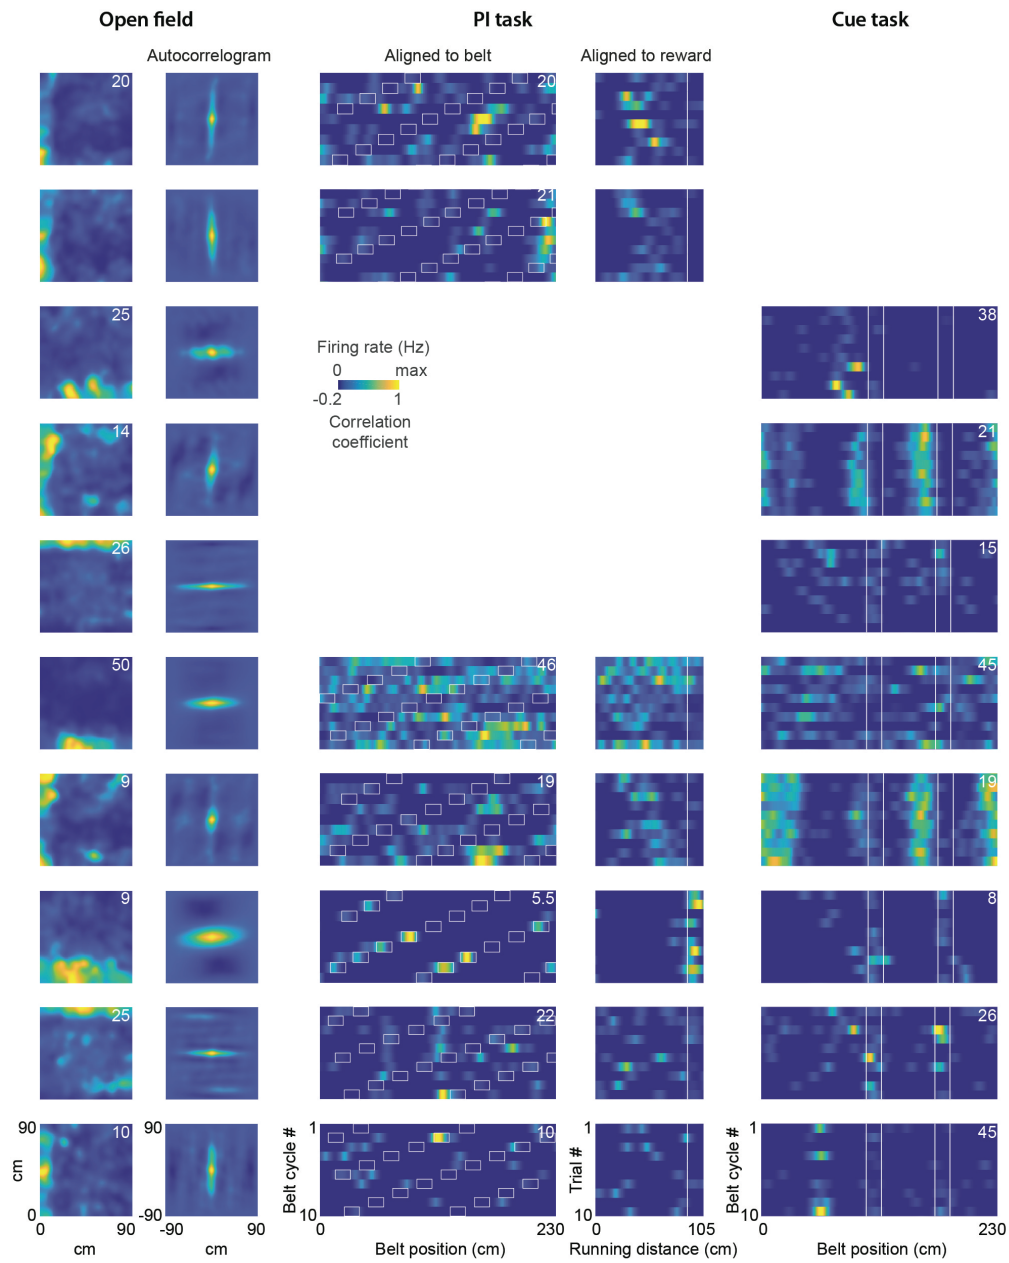

**Supplementary Figure 2.** Example border cells recorded across tasks, displayed as in Fig. 2. Bottom five cells were recorded consecutively in open field, PI, and cue tasks.

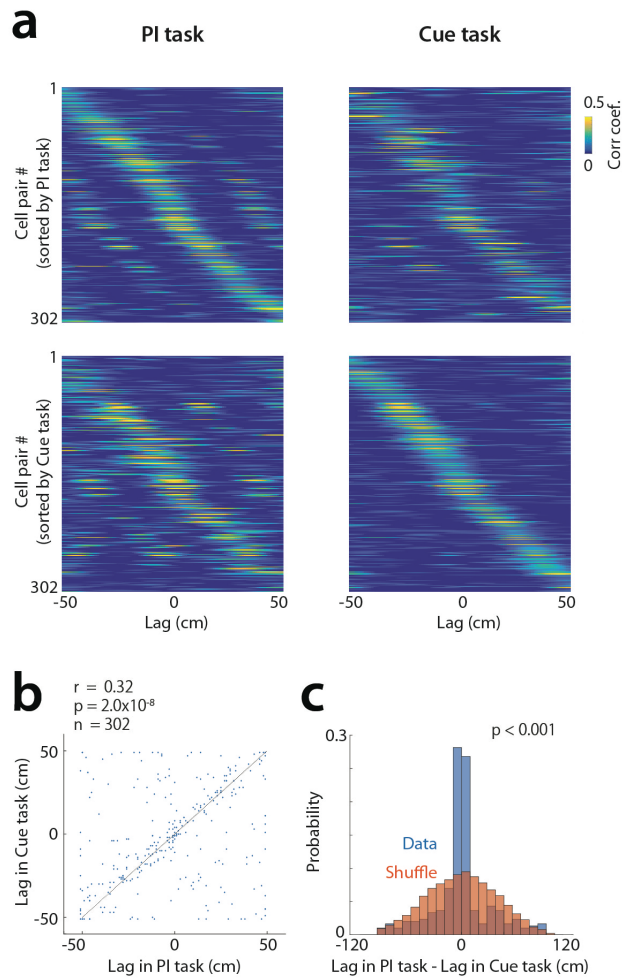

**Supplementary Figure 3.** Preservation of grid cell relationships across PI and cue tasks.

a, Spatial cross-correlograms (CCGs) for grid cell pairs recorded in PI (left) and cue (right). Pairs sorted by peak position in PI (top row) or cue (bottom row). Diagonal bands indicate preserved spatial relationships.

b, Cell-cell spatial shifts in cue versus PI tasks ( $n = 302$  pairs; Pearson correlation).

c, Change in cell-cell spatial shifts across tasks (blue) compared to shuffled distributions (orange, 1,000 shuffles;  $n = 302$  pairs; Wilcoxon signed-rank test on absolute values).

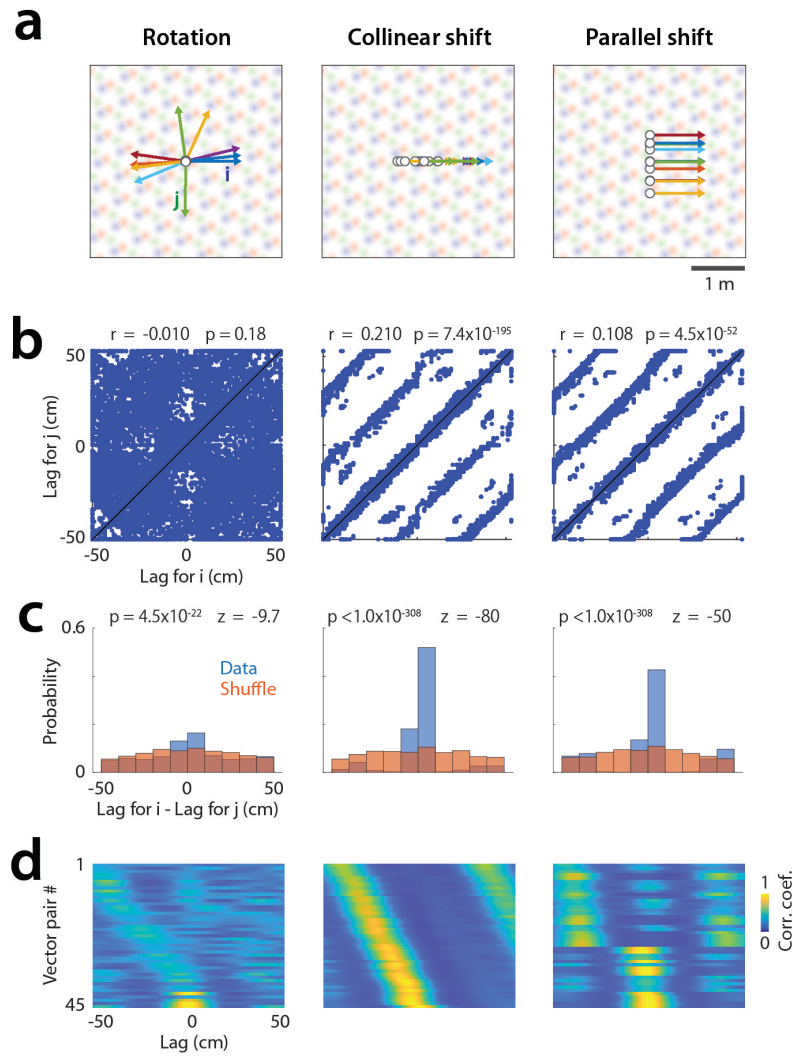

**Supplementary Figure 4.** Collinear trajectory shifts account for grid cell variability in the PI task.

a, Three trajectory vector alterations tested: rotation (left), collinear shift (middle), and parallel shift (right). Arrows, vectors (105 cm) used to generate firing rates for 30 model grid cells across 10 trajectories.

b, Spatial shifts between cell pairs across trajectory vectors, by alteration type ( $n = 19,575$  trajectory pairs; Pearson correlation). Rotation does not reproduce Fig. 4e patterns.

c, Change in cell–cell spatial shifts across trajectories (blue) versus shuffled identities (orange, one shuffle per trajectory;  $n = 19,575$  pairs; Wilcoxon rank-sum test).

d, Spatial cross-correlograms between population vectors of trajectory pairs. Parallel shifts fail to reproduce Fig. 4c–d patterns.

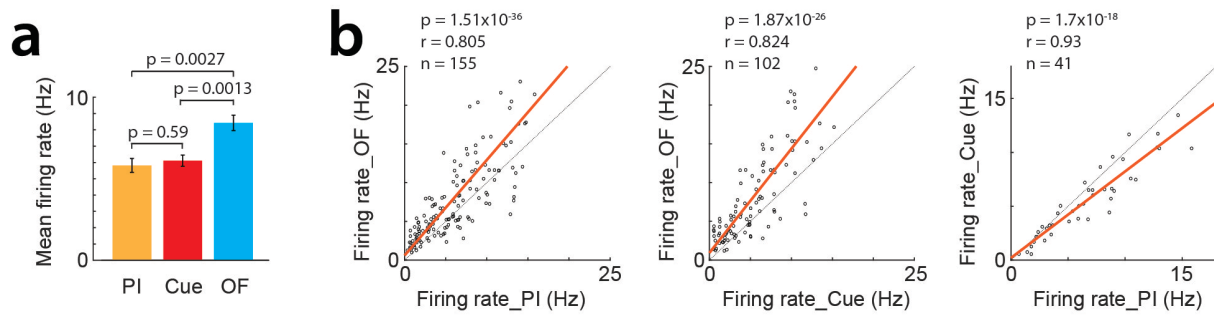

**Supplementary Figure 5.** Gird cell firing rates across tasks.

a, Firing rates (mean  $\pm$  s.e.m.,  $n = 155$  PI, 102 Cue, 216 OF cells; Wilcoxon rank-sum test).

b, Firing rates in pairwise task comparisons ( $n = 155$  PI vs OF, 102 Cue vs OF, 41 PI vs Cue cells; Pearson correlation).

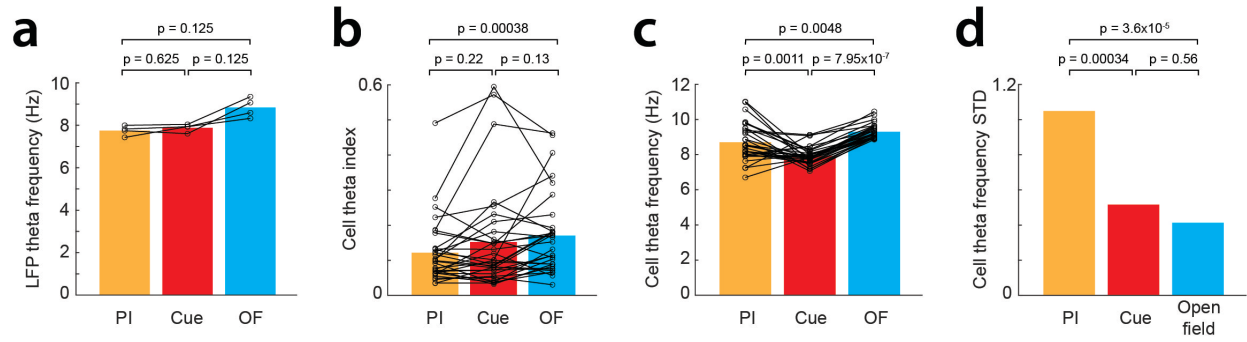

**Supplementary Figure 6.** Theta index and frequency in consecutively recorded sessions.

a, LFP theta frequency (mean  $\pm$  s.e.m.,  $n = 3$  sessions; Wilcoxon signed-rank test).

b, Grid cell theta index (mean  $\pm$  s.e.m.,  $n = 32$  cells; Wilcoxon signed-rank test).

c, Grid cell theta frequency (same cells as in b).

d, Standard deviation of grid cell theta frequency (same cells; Levene's test).
